# Supplementary material for: Assembly of a CdS quantum dot–TiO2 nanobelt heterostructure for photocatalytic application: towards an efficient visible light photocatalyst via facile surface charge tuning
Source: Royal Society of Chemistry journal article supplement (doi:10.1039/c4nj01346h), 2014-10-03
Supplement: c4nj01346h1.pdf [file c4nj01346h1.pdf]

## *Supporting information*

# **Assembly of CdS Quantum Dots-TiO<sub>2</sub> Nanobelts Heterostructure for Photocatalytic Application: Towards Efficient Visible Light Photocatalyst *via* Facile Surface Charge Tuning**

*Junyu Zhang<sup>a</sup>, Fang-Xing Xiao<sup>b\*</sup>, Guangcan Xiao<sup>a\*</sup>, Bin Liu<sup>b\*</sup>*

a College of Chemistry and Chemical Engineering, Instrumental Measurement and Analysis  
Center, Fuzhou University, Fuzhou, 350002, People's Republic of China.

b School of Chemical and Biomedical Engineering, Nanyang Technological University, 62  
Nanyang Drive, Singapore 637459, Singapore.

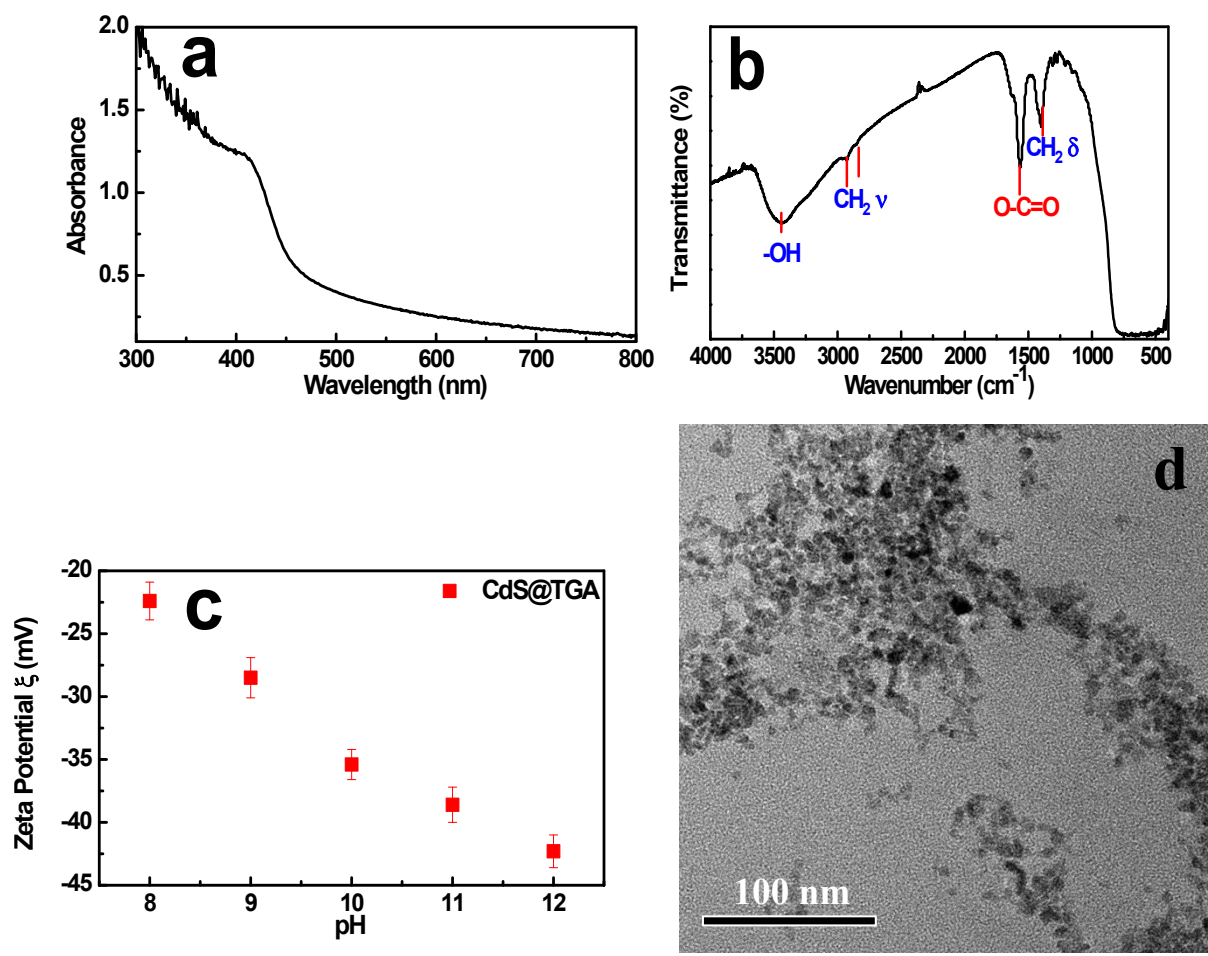

**Figure S1.** (a) UV-vis spectrum, (b) FTIR, (c) zeta potential, and (d) TEM image of CdS QDs.

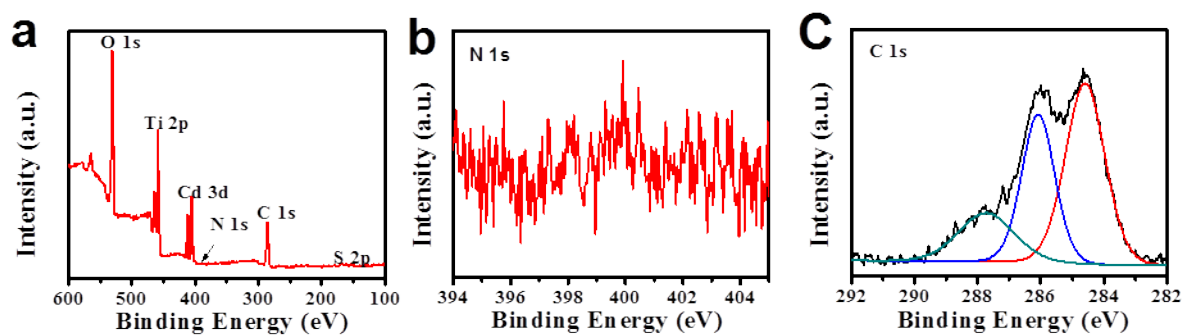

**Figure S2.** (a) Survey XPS spectrum and (b) high-resolution spectra of N1s and (c) C 1s for TiO<sub>2</sub> NBs-CdS QDs heterostructure.

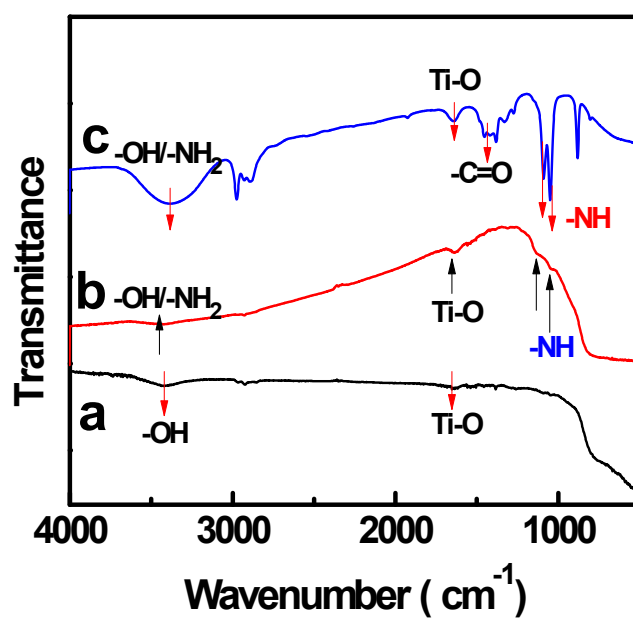

**Figure S3.** FTIR spectra of (a) blank TiO<sub>2</sub> NBs, (b) APTES-TiO<sub>2</sub> NBs, and (c) TiO<sub>2</sub> NBs-CdS QDs heterostructure.

**Table S1.** Chemical bond species *versus* binding energy for TiO<sub>2</sub> NBs-CdS QDs heterostructure

| <i>Element</i>       | <i>Peak BE</i> | <i>Chemical Bond Species</i>                 |
|----------------------|----------------|----------------------------------------------|
| C 1s A               | 284.59         | C-C/C-H                                      |
| C 1s B               | 286.08         | C-OH/C-O-C                                   |
| C 1s C               | 287.73         | Carboxylate (CO <sub>3</sub> <sup>2-</sup> ) |
| O 1s A               | 529.76         | Lattice Oxygen                               |
| O 1s B               | 532.05         | COOH                                         |
| Ti 2p <sub>3/2</sub> | 458.48         | Anatase (+4)                                 |
| Cd 3d <sub>5/2</sub> | 405.25         | Cd (+2)                                      |
| S 2p <sub>3/2</sub>  | 161.15         | S (2 <sup>-</sup> )                          |

**Table S2.** Elemental percentage for TiO<sub>2</sub> NBs-CdS QDs heterostructure

| <i>Name</i>         | <i>Peak (eV)</i> | <i>Chemical Bond Specie</i>                  | <i>At. %</i> |
|---------------------|------------------|----------------------------------------------|--------------|
| C1s Scan A          | 284.59           | C-C/C-H                                      | 16.17        |
| C1s Scan B          | 286.08           | C-OH/C-O-C                                   | 11.05        |
| C1s Scan C          | 287.73           | Carboxylate (CO <sub>3</sub> <sup>2-</sup> ) | 6.05         |
| O1s Scan A          | 529.76           | Lattice Oxygen                               | 24.66        |
| O1s Scan B          | 532.05           | COOH                                         | 23.41        |
| Ti2p <sub>7/2</sub> | 458.48           | Anatase (+4)                                 | 12.99        |
| Cd3d <sub>7/2</sub> | 405.25           | Cd (+2)                                      | 3.45         |
| S2p <sub>3/2</sub>  | 161.3            | S (2 <sup>-</sup> )                          | 2.02         |

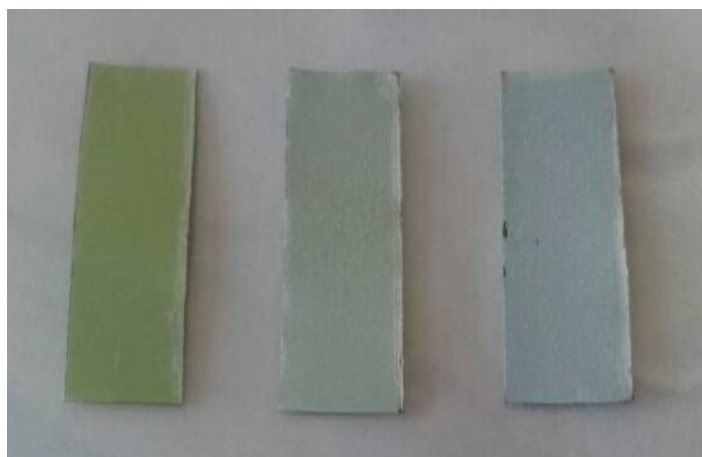

**Figure S4.** Photographs of blank TiO<sub>2</sub> NBs (*right: white*), TiO<sub>2</sub> NBs/CdS QDs (*middle: light yellow*), and TiO<sub>2</sub> NBs-CdS QDs heterostructure (*left: yellow*).

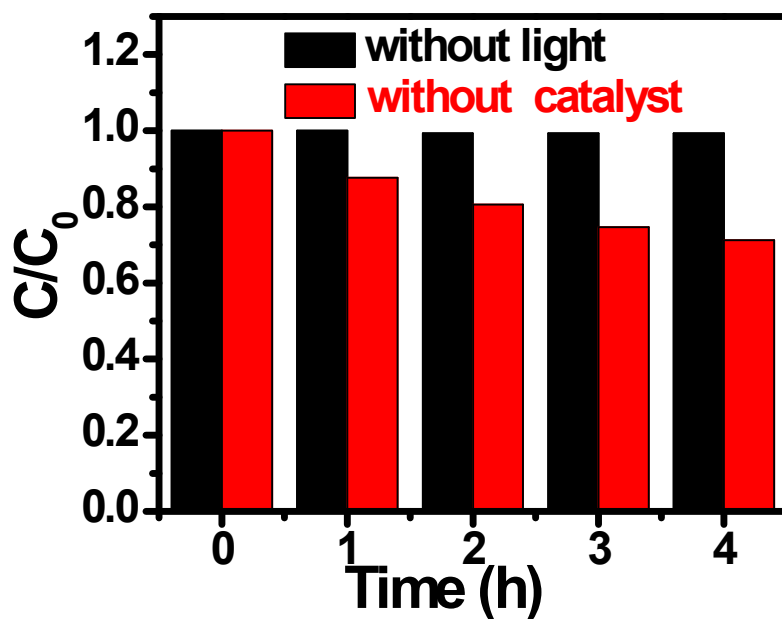

**Figure S5.** Blank experiments for photodegradation of RhB over TiO<sub>2</sub> NBs-CdS QDs heterostructure.

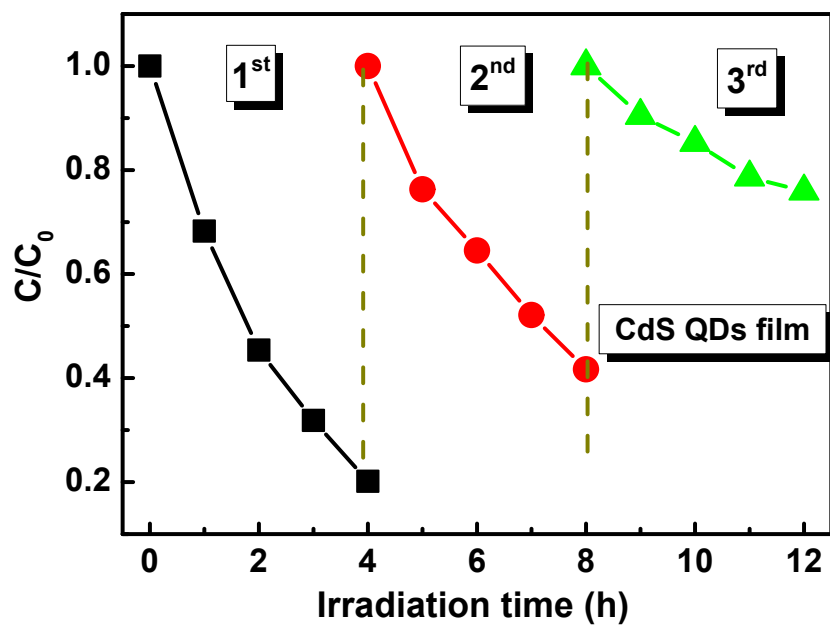

**Figure S6.** Cycling photocatalytic performances of blank CdS QDs film deposited on Ti foil under visible light irradiation ( $\lambda > 420$  nm).

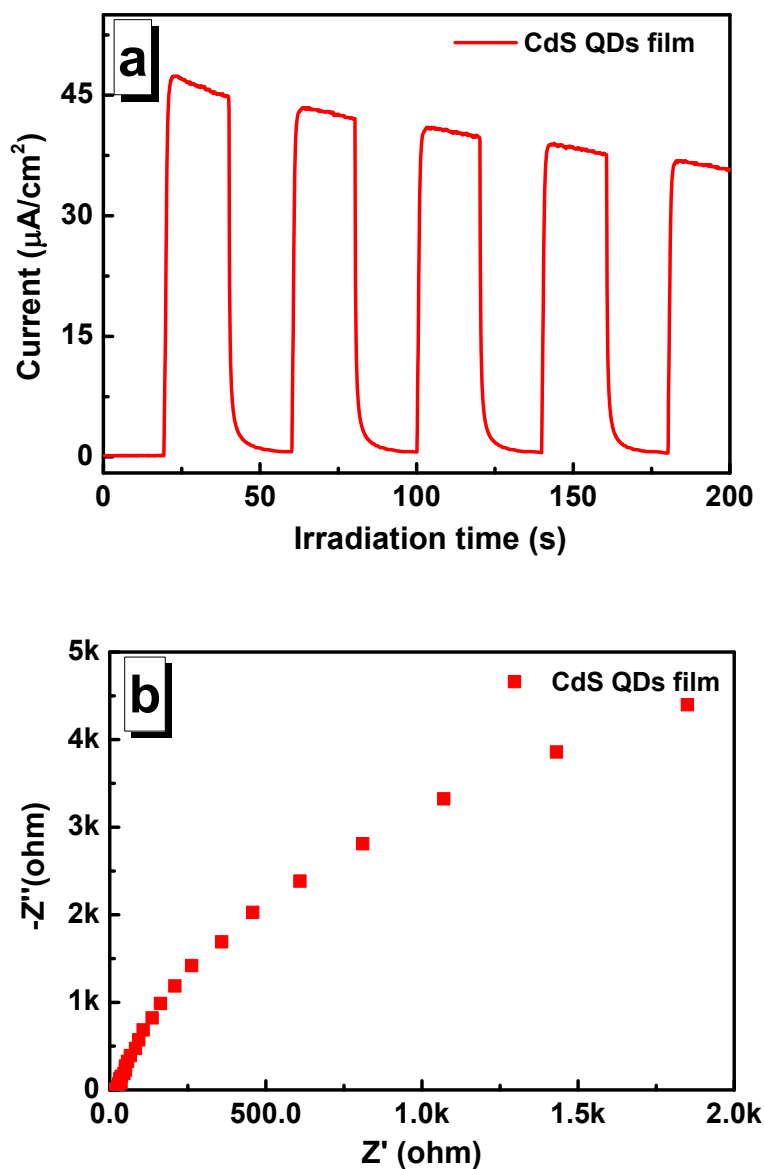

**Figure S7.** (a) Transient photocurrent responses and (b) Electrochemical impedance spectroscopy (EIS) of blank CdS QDs film deposited on Ti foil in 1 M KOH (pH = 13.9) aqueous solution under visible light irradiation ( $\lambda > 420$  nm), the amplitude of the sinusoidal wave was set at 10 mV and the frequency varied from 100 kHz to 0.05 Hz.
